# Supplementary material for: Relationships between Physical Activity Level and Pain in the Spanish Population: A Cross-Sectional Study
Source: MDPI journal article supplement (doi:10.3390/jpm12101591), 2022-09-27
Supplement: s1 [file s1]

# SUPPLEMENTARY MATERIAL

Table S1. Descriptive analysis of the Spanish population from the Spanish National Health Survey 2017.

| <b>Variables</b>                             |                              |                         |                           |           |
|----------------------------------------------|------------------------------|-------------------------|---------------------------|-----------|
| <b>Age (Years)</b>                           | <b>Overall<br/>(n=17777)</b> | <b>Men<br/>(n=8529)</b> | <b>Women<br/>(n=9248)</b> | <b>P</b>  |
| Median (IQR)                                 | 47 (21)                      | 47 (21)                 | 47 (21)                   | 0.295     |
| <b>IMC (kg/m2)</b>                           | <b>Overall<br/>(n=17273)</b> | <b>Men=8368</b>         | <b>Women=8905</b>         | <b>P</b>  |
| Median (IQR)                                 | 25.3 (5.9)                   | 26.1 (5.0)              | 24.2 (6.4)                | <0.001    |
| <b>Prevalence of pain<br/>n (%)</b>          | <b>Overall<br/>(n=17773)</b> | <b>Men<br/>(n=8526)</b> | <b>Women<br/>(n=9247)</b> | <b>p*</b> |
| Yes                                          | 7536 (42.4)                  | 3012 (35.3)             | 4524 (48.9)*              | <0.001    |
| No                                           | 10237 (57.6)                 | 5514 (64.7)             | 4723 (51.1)               |           |
| <b>Degree of pain<br/>n (%)</b>              |                              |                         |                           | <b>p*</b> |
| None                                         | 10237 (57.6)                 | 5514 (64.7)             | 4723 (51.1)               | <0.001    |
| Very light                                   | 1390 (7.8)                   | 653 (7.7)               | 737 (8.0)                 |           |
| Light                                        | 2518 (14.2)                  | 1067 (12.5)             | 1451 (15.7)               |           |
| Moderate                                     | 2351 (13.2)                  | 857 (10.1)              | 1494 (16.2)               |           |
| Severe                                       | 1062 (6.0)                   | 351 (4.1)               | 711 (7.7)                 |           |
| Extreme                                      | 215 (1.2)                    | 84 (1.0)                | 131 (1.4)                 |           |
| <b>Pain affect<br/>n (%)</b>                 | <b>Overall<br/>(n=17773)</b> | <b>Men<br/>(n=8526)</b> | <b>Women<br/>(n=9247)</b> | <b>p*</b> |
| Nothing                                      | 12388 (69.7)                 | 6473 (75.4)             | 5915 (64.0)               | <0.001    |
| Somewhat                                     | 2367 (13.3)                  | 962 (11.3)              | 1405 (15.2)               |           |
| Moderately                                   | 1627 (9.2)                   | 592 (6.9)               | 1035 (11.2)               |           |
| Quite a lot                                  | 952 (5.4)                    | 335 (3.9)               | 617 (6.7)                 |           |
| A lot                                        | 439 (2.5)                    | 164 (1.9)               | 275 (3.0)                 |           |
| <b>Pain limitation<br/>n (%)</b>             | <b>Overall<br/>(n=17777)</b> | <b>Men<br/>(n=8529)</b> | <b>Women<br/>(n=9248)</b> | <b>p*</b> |
| Yes                                          | 2383 (13.4)                  | 949 (11.1)              | 1434 (15.5)*              | <0.001    |
| Non                                          | 15394 (86.6)                 | 7580 (88.9)             | 7814 (84.5)               |           |
| <b>Pain medication<br/>n (%)</b>             | <b>Overall<br/>(n=17776)</b> | <b>Men<br/>(n=8529)</b> | <b>Women<br/>(n=9247)</b> | <b>p*</b> |
| Yes                                          | 5491 (30.9)                  | 2020 (23.7)             | 3471 (37.5)*              | <0.001    |
| No                                           | 12285 (69.1)                 | 6509 (76.3)             | 5776 (62.5)               |           |
| <b>Physical Activity<br/>Level<br/>n (%)</b> | <b>Overall<br/>(n=17717)</b> | <b>Men<br/>(n=8489)</b> | <b>Women<br/>(n=9228)</b> | <b>p*</b> |
| Inactive (PAI=0)                             | 2533 (14.3)                  | 1175 (13.8)             | 1358 (14.7)               | <0.001    |
| Walker (PAI=0)                               | 8067 (45.5)                  | 3390 (39.9)             | 4667 (50.7)               |           |
| Low (PAI=1-15)                               | 2433 (13.7)                  | 1120 (13.2)             | 1313 (14.2)               |           |
| Medium (PAI=16-30)                           | 2456 (13.9)                  | 1341 (15.8)             | 1115 (12.1)               |           |
| High (PAI=31-45)                             | 1472 (8.3)                   | 954 (11.2)              | 518 (5.6)                 |           |
| Very High (PAI=+45)                          | 756 (4.3)                    | 509 (6.0)               | 247 (2.7)                 |           |

IQR (Interquartile Range); n (Number of participants); % (Percentage of people in each group); BMI (Body Mass Index); p (p-value from Mann-Whitney U-test); p\* (p-value from chi-square test); PAI (Physical Activity Index); Inactive (PAI=0; Declare not to go for a walk for more than 10 minutes at a time); Walker (PAI=0; Declare walking for more than 10 minutes at a time); Low (PAI between 1 and 15); Medium (PAI between 16 and 30); High (PAI between 31 and 45); Very High (PAI greater than 45); \* (Significant differences between proportions with p<0.05 in pairwise z-test).

Table S2. Relationship between level of physical activity and prevalence of pain in the Spanish population.

| Overall   |                         |                    |                 |                    |                  |                      |                |    |        |       |
|-----------|-------------------------|--------------------|-----------------|--------------------|------------------|----------------------|----------------|----|--------|-------|
| Variable  | Physical activity level |                    |                 |                    |                  |                      | x <sup>2</sup> | df | p      | cc    |
| Pain      | Inactive<br>(n=2531)    | Walker<br>(n=8066) | Low<br>(n=2433) | Medium<br>(n=2456) | High<br>(n=1472) | Very High<br>(n=756) |                |    |        |       |
| Yes n (%) | 1313 (51.9)a            | 3648 (45.2)b       | 986 (40.5)c     | 863 (35.1)d        | 469 (31.9)d      | 237 (31.3)d          | 280.7          | 5  | <0.001 | 0.125 |
| No n (%)  | 1218 (48.1)a            | 4418 (54.8)b       | 1447 (59.5)c    | 1593 (64.9)d       | 1003 (68.1)d     | 519 (68.7)d          |                |    |        |       |
| Men       |                         |                    |                 |                    |                  |                      |                |    |        |       |
|           | Inactive<br>(n=1174)    | Walker<br>(n=3389) | Low<br>(n=1120) | Medium<br>(n=1341) | High<br>(n=954)  | Very high<br>(n=509) | 150.1          | 5  | <0.001 | 0.132 |
| Yes n (%) | 537 (45.7)a             | 1317 (38.9)b       | 370 (33.0)c     | 386 (28.8)c,d      | 257 (26.9)d      | 133 (26.1)c,d        |                |    |        |       |
| No n (%)  | 637 (54.3)a             | 2072 (61.1)b       | 750 (67.0)c     | 955 (71.2)c,d      | 697 (73.1)d      | 376 (73.9)c,d        |                |    |        |       |
| Women     |                         |                    |                 |                    |                  |                      |                |    |        |       |
|           | Inactive<br>(n=1357)    | Walker<br>(n=4677) | Low<br>(n=1313) | Medium<br>(n=1115) | High<br>(n=518)  | Very high<br>(n=247) | 75.4           | 5  | <0.001 | 0.090 |
| Yes n (%) | 776 (57.2)a             | 2331 (51.6)b       | 616 (46.9)b,c   | 477 (42.8)c        | 212 (40.9)c      | 104 (42.1)b,c        |                |    |        |       |
| No n (%)  | 581 (42.8)a             | 2346 (50.2)b       | 697 (53.1)b,c   | 638 (57.2)c        | 306 (59.1)c      | 143 (57.9)b,c        |                |    |        |       |

n (participants); % (percentage); PAI (Physical Activity Index); Inactive (PAI=0; Declare not to go for a walk for more than 10 minutes at a time); Walker (PAI=0; Declare walking for more than 10 minutes at a time); Low (PAI between 1 and 15); Medium (PAI between 16 and 30); High (PAI between 31 and 45); Very High (PAI greater than 45); x<sup>2</sup> (Pearson's chi-square); p (p-value); df (degree freedom); cc (Contingency coefficient); abcd (Each subscript letter denotes a subset of PAL whose proportions of prevalence of pain do not differ significantly from each other with p<0.05 from z-test)

Table S3. Relationship between level of physical activity and prevalence of pain in the Spanish population.

| Overall          |                         |                    |                 |                    |                  |                      |                |    |        |       |
|------------------|-------------------------|--------------------|-----------------|--------------------|------------------|----------------------|----------------|----|--------|-------|
| Variable         | Physical activity level |                    |                 |                    |                  |                      | x <sup>2</sup> | df | p      | cc    |
| Degree of pain   | Inactive<br>(n=2531)    | Walker<br>(n=8066) | Low<br>(n=2433) | Medium<br>(n=2456) | High<br>(n=1472) | Very High<br>(n=756) |                |    |        |       |
| Extreme n (%)    | 86 (3.4)a               | 87 (1.1)b          | 14 (0.6)b       | 18 (0.7)b          | 5 (0.3)b         | 6 (0.8)b             | 566.4          | 25 | <0.001 | 0.176 |
| Severe n (%)     | 269 (10.6)a             | 547 (6.8)b         | 107 (4.4)c      | 82 (3.3)c,d        | 33 (2.2)d        | 24 (3.2)c,d          |                |    |        |       |
| Moderate n (%)   | 450 (17.8)a             | 1175 (14.6)b       | 292 (12.0)c     | 254 (10.3)c,d      | 117 (7.9)d       | 59 (7.8)d            |                |    |        |       |
| Light n (%)      | 364 (14.4)a             | 1174 (14.6)a       | 366 (15.0)a     | 307 (12.5)a        | 198 (13.5)a      | 97 (12.8)a           |                |    |        |       |
| Very light n (%) | 145 (5.7)a              | 665 (8.2)b         | 207 (8.5)b      | 202 (8.2)b         | 116 (7.9)a,b     | 51 (6.7)a,b          |                |    |        |       |
| None n (%)       | 1218 (48.1)a            | 4418 (54.8)b       | 1447 (59.5)c    | 1593 (64.9)d       | 1003 (68.1)d     | 519 (68.7)d          |                |    |        |       |
| Men              |                         |                    |                 |                    |                  |                      |                |    |        |       |
|                  | Inactive<br>(n=1174)    | Walker<br>(n=3389) | Low<br>(n=1120) | Medium<br>(n=1341) | High<br>(n=954)  | Very high<br>(n=509) | 297.5          | 25 | <0.001 | 0.184 |
| Extreme n (%)    | 36 (3.1)a               | 32 (0.9)b          | 1 (0.1)b        | 9 (0.7)b           | 3 (0.3)b         | 3 (0.6)b             |                |    |        |       |
| Severe n (%)     | 89 (7.6)a               | 175 (5.2)b         | 35 (3.1)b,c     | 30 (2.2)c          | 14 (1.5)c        | 8 (1.6)c             |                |    |        |       |
| Moderate n (%)   | 180 (15.3)a             | 393 (11.6)b        | 84 (7.5)c       | 104 (7.8)c         | 65 (6.8)c        | 28 (5.5)c            |                |    |        |       |
| Light n (%)      | 166 (14.1)a             | 437 (12.9)a        | 147 (13.1)a     | 144 (10.7)a        | 111 (11.6)a      | 56 (11.0)a           |                |    |        |       |
| Very light n (%) | 66 (5.6)a               | 280 (8.3)b         | 103 (9.2)b      | 99 (7.4)a,b        | 64 (6.7)a,b      | 38 (7.5)a,b          |                |    |        |       |
| None n (%)       | 637 (54.3)a             | 2072 (61.1)b       | 750 (67.0)c     | 955 (71.2)c,d      | 697 (73.1)d      | 376 (73.9)c,d        |                |    |        |       |
| Women            |                         |                    |                 |                    |                  |                      |                |    |        |       |
|                  | Inactive<br>(n=1357)    | Walker<br>(n=4677) | Low<br>(n=1313) | Medium<br>(n=1115) | High<br>(n=518)  | Very High<br>(n=247) | 231.9          | 25 | <0.001 | 0.157 |
| Extreme n (%)    | 49 (3.6)a               | 55 (1.2)c          | 13 (1.0)b       | 9 (0.8)b           | 2 (0.4)b         | 3 (1.2)a,b           |                |    |        |       |
| Severe n (%)     | 180 (13.3)a             | 372 (8.0)b         | 72 (5.5)c       | 52 (4.7)c          | 19 (3.7)c        | 16 (6.5)b,c          |                |    |        |       |
| Moderate n (%)   | 270 (19.9)a             | 782 (16.7)a,b      | 208 (15.8)a,b   | 150 (13.5)b,c      | 52 (10.0)c       | 31 (12.6)a,b,c       |                |    |        |       |
| Light n (%)      | 198 (14.6)a             | 737 (15.8)a        | 219 (16.7)a     | 163 (14.6)a        | 87 (16.8)a       | 41 (16.6)a           |                |    |        |       |
| Very light n (%) | 79 (5.8)a               | 385 (8.2)a,b       | 104 (7.9)a,b    | 103 (9.2)b         | 52 (10.0)b       | 13 (5.3)a,b          |                |    |        |       |
| None n (%)       | 581 (42.8)a             | 2346 (50.2)b       | 697 (53.1)a,b   | 638 (57.2)c        | 306 (59.1)c      | 143 (57.9)b,c        |                |    |        |       |

n (participants); % (percentage); PAI (Physical Activity Index); Inactive (PAI=0; Declare not to go for a walk for more than 10 minutes at a time); Walker (PAI=0; Declare walking for more than 10 minutes at a time); Low (PAI between 1 and 15); Medium (PAI between 16 and 30); High (PAI between 31 and 45); Very High (PAI greater than 45); x<sup>2</sup> (Pearson's chi-square); p (p-value); df (degree freedom); cc (Contingency coefficient); abcd (Each subscript letter denotes a subset of PAL whose proportions of each prevalence of degree of pain do not differ significantly from each other with p<0.05 from z-test).

Table S4. Relationship between level of physical activity and prevalence of pain in the Spanish population.

| Overall          |                         |                    |                 |                    |                  |                      |                |    |        |       |
|------------------|-------------------------|--------------------|-----------------|--------------------|------------------|----------------------|----------------|----|--------|-------|
| Variable         | Physical activity level |                    |                 |                    |                  |                      | x <sup>2</sup> | df | p      | cc    |
| Pain affect      | Inactive<br>(n=2531)    | Walker<br>(n=8067) | Low<br>(n=2433) | Medium<br>(n=2456) | High<br>(n=1472) | Very High<br>(n=756) |                |    |        |       |
| Nothing n(%)     | 1463 (57.8)a            | 5402 (67.0)b       | 1777 (73.0)c    | 1914 (77.9)d       | 1177 (80.0)d     | 608 (80.4)d          | 603.3          | 20 | <0.001 | 0.181 |
| Somewhat n(%)    | 356 (14.1)a,b           | 1138 (14.1)b       | 333 (13.7)a,b   | 278 (11.3)a        | 172 (11.7)a,b    | 83 (11.0)a,b         |                |    |        |       |
| Moderately n(%)  | 309 (12.2)a             | 855 (10.6)a        | 199 (8.2)b      | 155 (6.3)b,c       | 75 (5.1)c        | 30 (4.0)c            |                |    |        |       |
| Quite a lot n(%) | 247 (9.8)a              | 479 (6.0)b         | 89 (3.7)c       | 78 (3.2)c          | 33 (2.2)c        | 26 (3.4)b,c          |                |    |        |       |
| A lot n(%)       | 156 (6.2)a              | 192 (2.4)b         | 35 (1.4)b,c     | 31 (1.3)c          | 15 (1.0)c        | 9 (1.2)b,c           |                |    |        |       |
| Men              |                         |                    |                 |                    |                  |                      |                |    |        |       |
|                  | Inactive<br>(n=1174)    | Walker<br>(n=3390) | Low<br>(n=1120) | Medium<br>(n=1341) | High<br>(n=954)  | Very High<br>(n=509) | 321.5          | 20 | <0.001 | 0.191 |
| Nothing n(%)     | 742 (63.2)a             | 2459 (72.5)b       | 892 (79.6)c     | 1119 (83.4)c       | 798 (83.6)c      | 433 (85.1)c          |                |    |        |       |
| Somewhat n(%)    | 151 (12.9)a             | 430 (12.8)a        | 126 (11.3)a,b   | 113 (8.4)b         | 95 (10.0)a,b     | 42 (8.3)a,b          |                |    |        |       |
| Moderately n(%)  | 123 (10.5)a             | 282 (8.3)a,b       | 66 (5.9)b,c     | 64 (4.8)c          | 38 (4.0)c        | 16 (3.1)c            |                |    |        |       |
| Quite a lot n(%) | 97 (8.3)a               | 150 (4.4)b         | 22 (2.0)c       | 36 (2.7)b,c        | 16 (1.7)c        | 15 (2.9)b,c          |                |    |        |       |
| A lot n(%)       | 61 (5.2)a               | 69 (2.0)b          | 14 (1.3)b,c     | 9 (0.7)c           | 7 (0.7)b,c       | 3 (0.6)b,c           | Women          |    |        |       |
|                  | Inactive<br>(n=1357)    | Walker<br>(n=4677) | Low<br>(n=1313) | Medium<br>(n=1115) | High<br>(n=518)  | Very High<br>(n=247) | 245.3          | 20 | <0.001 | 0.161 |
| Nothing n(%)     | 721 (53.1)a             | 2943 (62.9)b       | 885 (67.4)c     | 795 (71.3)c        | 379 (73.2)c      | 175 (70.9)b,c        |                |    |        |       |
| Somewhat n(%)    | 205 (15.1)a             | 708 (15.1)a        | 207 (15.8)a     | 165 (14.8)a        | 77 (14.9)a       | 41 (16.6)a           |                |    |        |       |
| Moderately n(%)  | 186 (13.7)a             | 573 (12.3)a        | 133 (10.1)a,b   | 91 (8.2)c          | 37 (7.1)b        | 14 (5.7)b            |                |    |        |       |
| Quite a lot n(%) | 150 (11.1)a             | 330 (7.1)b         | 67 (5.1)b,c     | 42 (3.8)c          | 17 (3.3)c        | 11 (4.5)b,c          |                |    |        |       |
| A lot n(%)       | 95 (7.0)a               | 123 (2.6)b         | 21 (1.6)b       | 22 (2.0)b          | 8 (1.5)b         | 6 (2.4)a,b           |                |    |        |       |

n (participants); % (percentage); PAI (Physical Activity Index); Inactive (PAI=0; Declare not to go for a walk for more than 10 minutes at a time); Walker (PAI=0; Declare walking for more than 10 minutes at a time); Low (PAI between 1 and 15); Medium (PAI between 16 and 30); High (PAI between 31 and 45); Very High (PAI greater than 45); x<sup>2</sup> (P-value from chi-square test); abcd (Each subscript letter denotes a subset of PAL whose proportions of each prevalence of pain affect do not differ significantly from each other with p<0.05 from z-test).

Table S5. Relationship between level of physical activity and suffering limitations to perform daily activities due to pain in the Spanish population of the ENSE 2017.

| Overall                |                         |                 |                |                 |               |                   |                |    |        |       |
|------------------------|-------------------------|-----------------|----------------|-----------------|---------------|-------------------|----------------|----|--------|-------|
| Variable               | Physical activity level |                 |                |                 |               |                   | x <sup>2</sup> | df | p      | cc    |
| Limitation due to pain | Inactive (n=2533)       | Walker (n=8067) | Low (n=2433)   | Medium (n=2456) | High (n=1472) | Very High (n=756) |                |    |        |       |
| Yes n (%)              | 545 (21.5)a             | 1136 (14.1)b    | 261 (10.7)c    | 241 (9.8)c      | 125 (8.5)c    | 71 (9.4)c         | 232.5          | 6  | <0.001 | 0.114 |
| No n (%)               | 1988 (78.5)a            | 6931 (85.9)b    | 2172 (89.3)c   | 2215 (90.2)c    | 1347 (91.5)c  | 685 (90.6)c       |                |    |        |       |
| Men                    |                         |                 |                |                 |               |                   |                |    |        |       |
|                        | Inactive (n=1174)       | Walker (n=3389) | Low (n=1120)   | Medium (n=1341) | High (n=954)  | Very high (n=509) | 105.5          | 6  | <0.001 | 0.110 |
| Yes n (%)              | 221 (18.8)a             | 398 (11.7)b     | 101 (9.0)b,c   | 118 (8.8)b,c    | 67 (7.0)c     | 41 (8.1)b,c       |                |    |        |       |
| No n (%)               | 954 (81.2)a             | 2992 (88.3)b    | 1019 (91.0)b,c | 1223 (91.2)b,c  | 887 (93.0)c   | 468 (91.9)b,c     |                |    |        |       |
| Women                  |                         |                 |                |                 |               |                   |                |    |        |       |
|                        | Inactive (n=1357)       | Walker (n=4677) | Low (n=1313)   | Medium (n=1115) | High (n=518)  | Very high (n=247) | 111.8          | 6  | <0.001 | 0.109 |
| Yes n (%)              | 324 (23.9)a             | 738 (15.8)b     | 160 (12.2)c    | 123 (11.0)c     | 58 (11.2)b,c  | 30 (12.1)b,c      |                |    |        |       |
| No n (%)               | 1034 (76.1)a            | 3939 (84.2)b    | 1153 (87.8)c   | 992 (89.0)c     | 460 (88.8)b,c | 217 (87.9)b,c     |                |    |        |       |

n (participants); % (percentage); PAI (Physical Activity Index); Inactive (PAI=0; Declare not to go for a walk for more than 10 minutes at a time); Walker (PAI=0; Declare walking for more than 10 minutes at a time); Low (PAI between 1 and 15); Medium (PAI between 16 and 30); High (PAI between 31 and 45); Very High (PAI greater than 45); x<sup>2</sup> (Pearson's chi-square); p (p-value from chi-square test); df (Degree freedom); cc (Contingency coefficient); abcd (Each subscript letter denotes a subset of PAL whose proportions of prevalence of limitation due to pain do not differ significantly from each other with p<0.05 from z-test).

Table S6. Relationship between level of physical activity and the use of pain medication in the Spanish population in the ENSE 2017.

| Overall         |                         |                    |                 |                    |                  |                      |                |    |        |       |
|-----------------|-------------------------|--------------------|-----------------|--------------------|------------------|----------------------|----------------|----|--------|-------|
| Variable        | Physical activity level |                    |                 |                    |                  |                      | x <sup>2</sup> | df | p      | cc    |
| Pain medication | Inactive<br>(n=2533)    | Walker<br>(n=8066) | Low<br>(n=2433) | Medium<br>(n=2456) | High<br>(n=1472) | Very High<br>(n=756) |                |    |        |       |
| Yes n (%)       | 939 (37.1)a             | 2723 (33.8)b       | 721 (29.6)c     | 577 (23.5)d        | 337 (22.9)d      | 184 (24.3)c,d        | 200.3          | 5  | <0.001 | 0.106 |
| No n (%)        | 1594 (62.9)a            | 5343 (66.2)b       | 1712 (70.4)c    | 1879 (76.5)d       | 1135 (77.1)d     | 572 (75.7)c,d        |                |    |        |       |
| Men             |                         |                    |                 |                    |                  |                      |                |    |        |       |
|                 | Inactive<br>(n=1175)    | Walker<br>(n=3390) | Low<br>(n=1120) | Medium<br>(n=1341) | High<br>(n=954)  | Very High<br>(n=509) |                |    |        |       |
| Yes n (%)       | 351 (29.9)a             | 887 (26.2)a,b      | 256 (22.9)b,c   | 239 (17.8)d        | 176 (18.4)c,d    | 104 (20.4)b,c,d      | 80.9           | 5  | <0.001 | 0.096 |
| No n (%)        | 824 (70.1)a             | 2503 (73.8)a,b     | 864 (77.1)b,c   | 1102 (82.2)d       | 778 (81.6)c,d    | 405 (79.6)b,c,d      |                |    |        |       |
| Women           |                         |                    |                 |                    |                  |                      |                |    |        |       |
|                 | Inactive<br>(n=1358)    | Walker<br>(n=4676) | Low<br>(n=1313) | Medium<br>(n=1115) | High<br>(n=518)  | Very High<br>(n=247) |                |    |        |       |
| Yes n (%)       | 588 (43.3)a             | 1836 (39.3)a,b     | 465 (35.4)b,c   | 338 (30.3)c        | 161 (31.1)c      | 80 (32.4)b,c         | 64.5           | 5  | <0.001 | 0.083 |
| No n (%)        | 770 (56.7)a             | 2840 (60.7)a,b     | 848 (64.6)b,c   | 777 (69.7)c        | 357 (68.9)c      | 167 (67.6)b,c        |                |    |        |       |

n (participants); % (percentage); PAI (Physical Activity Index); Inactive (PAI=0; Declare not to go for a walk for more than 10 minutes at a time); Walker (PAI=0; Declare walking for more than 10 minutes at a time); Low (PAI between 1 and 15); Medium (PAI between 16 and 30); High (PAI between 31 and 45); Very High (PAI greater than 45); p (P-value from chi-square test); abcd (Each subscript letter denotes a subset of PAL whose proportions of prevalence of use of pain medication do not differ significantly from each other with  $p < 0.05$  from z-test)
